# Supplementary material
Source: PubMed Central journal article supplement (PMC4982794)
Supplement: NIHMS789012-supplement-Suplemment_Table_1.pdf [file NIHMS789012-supplement-Suplemment_Table_1.pdf]

**Supplement Table 1.**

| Author (year)             | Randomization | Allocation Concealment | Blinding of participants and researchers | Blinding of outcome assessment | Incomplete outcome data | Selective reporting |
|---------------------------|---------------|------------------------|------------------------------------------|--------------------------------|-------------------------|---------------------|
| Bathon, et al. (2000)     | ?             | ?                      | ?                                        | L                              | L                       | L                   |
| Bong Lee, et al. (2014)   | L             | L                      | ?                                        | ?                              | L                       | L                   |
| Breedveld, et al. (2006)  | L             | ?                      | L                                        | L                              | L                       | L                   |
| Burmester, et al. (2015)  | ?             | ?                      | ?                                        | ?                              | L                       | L                   |
| Detert, et al. (2013)     | ?             | ?                      | ?                                        | ?                              | L                       | L                   |
| Durez , et al. (2008)     | ?             | ?                      | ?                                        | L                              | L                       | L                   |
| Emery, et al. (2008)      | L             | L                      | L                                        | L                              | L                       | L                   |
| Emery, et al. (2009)      | L             | L                      | L                                        | L                              | L                       | L                   |
| Jones, et al. (2009)      | L             | L                      | L                                        | L                              | L                       | L                   |
| Smolen, et al. (2014)     | L             | L                      | L                                        | L                              | L                       | L                   |
| St Clair, et al. (2004)   | L             | ?                      | L                                        | L                              | L                       | L                   |
| Tak, et al. (2010)        | L             | L                      | L                                        | L                              | L                       | L                   |
| Westhovens, et al. (2009) | ?             | ?                      | L                                        | L                              | L                       | L                   |

**Table1.** Risk of bias assessment of included studies. ?, Unclear risk of bias; L, Low risk of bias.
